# Supplementary material for: Antineoplastic Nature of WWOX in Glioblastoma Is Mainly a Consequence of Reduced Cell Viability and Invasion
Source: MDPI journal article supplement (doi:10.3390/biology12030465), 2023-03-17
Supplement: s1 [file s1]

**Table S1.** Data acquired from cBioPortal and CCLE on the mutational status, CNAs, and mRNA expression of genes identified throughout the discussion of results.

|                    | T98G                 |       |                 | U87MG   |      |                 | U251MG  |       |                 | DBTRG-05MG |       |                 |
|--------------------|----------------------|-------|-----------------|---------|------|-----------------|---------|-------|-----------------|------------|-------|-----------------|
|                    | CNA <sup>#</sup>     | Mut.* | mRNA expression | CNA     | Mut. | mRNA expression | CNA     | Mut.  | mRNA expression | CNA        | Mut.  | mRNA expression |
| <b>AKT1</b>        | no alt. <sup>†</sup> |       | 43.62067        | no alt. |      | 39.27408        | no alt. |       | 32.03077        | no alt.    |       | 47.24887        |
| <b>BRAF</b>        | no alt.              |       | 3.48314         | no alt. |      | 4.18347         | no alt. |       | 5.05805         | no alt.    | V600E | 3.28902         |
| <b>CDH1</b>        | no alt.              |       | 0.07831         | no alt. |      | 0.08822         | no alt. |       | 0.15062         | no alt.    |       | 0.2802          |
| <b>ELF5</b>        | no alt.              |       | 0.01236         | no alt. |      | 0.4491          | no alt. |       | 0.01266         | no alt.    |       | 0.05916         |
| <b>IDH1</b>        | no alt.              |       | 44.8614         | no alt. |      | 51.77509        | no alt. |       | 40.65739        | no alt.    |       | 35.94795        |
| <b>IDH3G</b>       | no alt.              |       | 26.27039        | no alt. |      | 24.18385        | no alt. |       | 25.21216        | no alt.    | R109W | 28.79707        |
| <b>RUNX2</b>       | no alt.              |       | 13.01955        | no alt. |      | 4.66042         | no alt. |       | 8.68072         | no alt.    |       | 3.81298         |
| <b>SMAD3</b>       | no alt.              |       | 38.82957        | no alt. |      | 21.21619        | no alt. |       | 25.25521        | no alt.    |       | 18.77967        |
| <b>SNAI1</b>       | no alt.              |       | 8.11037         | no alt. |      | 0.60624         | no alt. |       | 0.63004         | no alt.    |       | 1.75119         |
| <b>TNK2 (ACK1)</b> | no alt.              |       | 6.85204         | no alt. |      | 6.51467         | no alt. |       | 9.53257         | no alt.    |       | 4.93732         |
| <b>TP53</b>        | no alt.              | M237I | 48.94476        | no alt. |      | 7.00334         | no alt. | R273H | 38.63569        | no alt.    |       | 14.73492        |

# – copy number alteration; \* – mutation; † – no alteration.
